# Supplementary material for: Postnatal prolongation of mammalian nephrogenesis by excess fetal GDNF
Source: Oxford University Press journal article supplement (doi:10.1242/dev.197475), 2021-05-15
Supplement: dev197475supp.pdf [file dev197475supp.pdf]

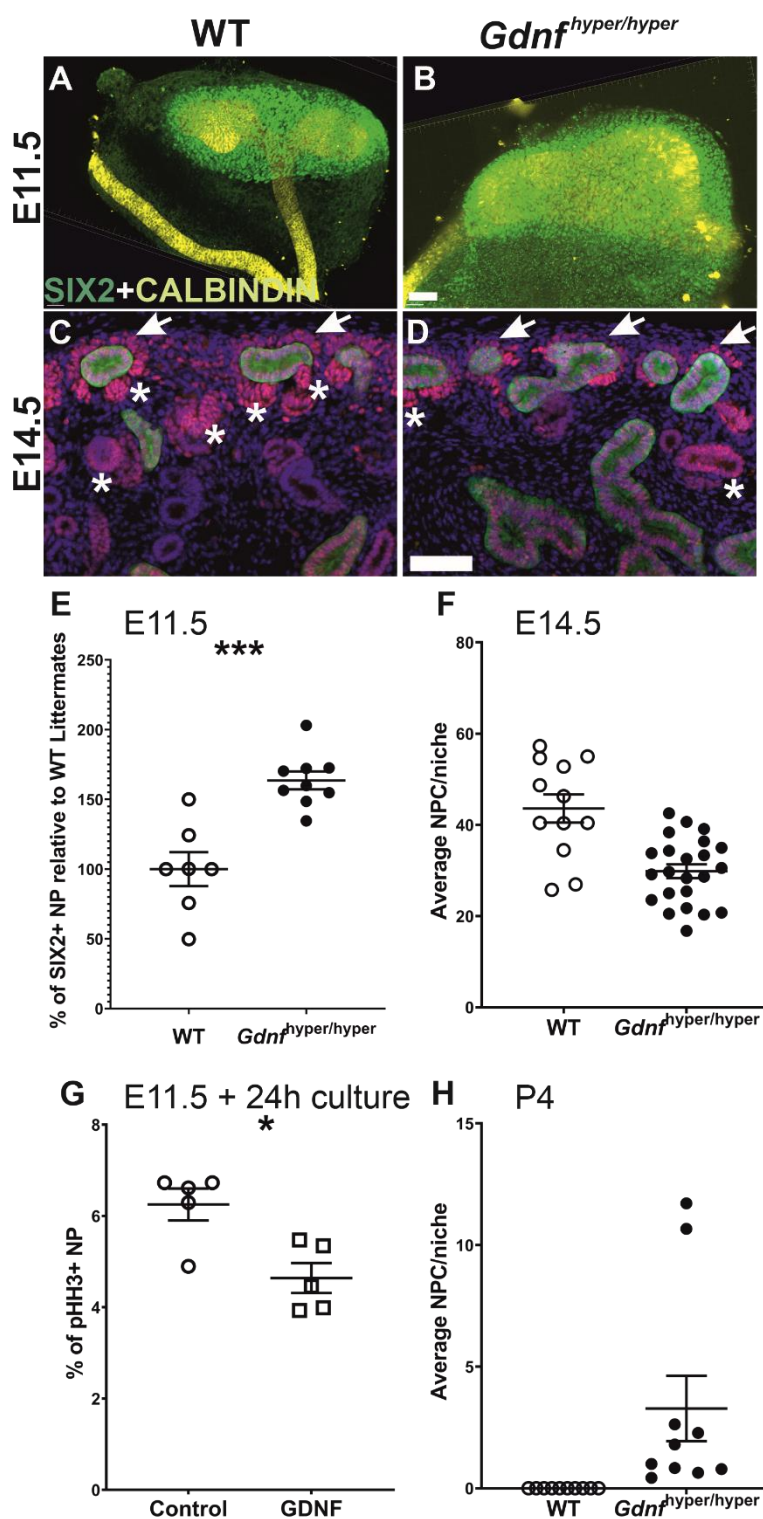

**Figure S1. Decreased nephron progenitor cell numbers and proliferation in *Gdnf<sup>hyper/hyper</sup>* kidneys.** (A) Three-dimensional reconstructed apotome z-stacked images of representative E11.5 WT and (B)

*Gdnf*<sup>hyper/hyper</sup> kidneys stained with CALBINDIN (yellow) and SIX2 (green). (C) PAX2 (red) and E-CADHERIN (green) localization in wild type (WT) and (B) *Gdnf*<sup>hyper/hyper</sup> kidneys at E14.5 shows decrease in nephron progenitors (NP, arrows) and enlargement of ureteric bud epithelium (green). Asterisks mark the differentiating nephron precursors, which are greatly reduced in *Gdnf*<sup>hyper/hyper</sup> kidneys. For each staining at given stage n=3 kidneys/genotype were used. (E) Comparison of SIX2-positive NP amount in WT and *Gdnf*<sup>hyper/hyper</sup> kidneys shows increased initial NP pool in *Gdnf*<sup>hyper/hyper</sup> kidneys at E11.5. Data are presented as mean quantity of SIX2-positive NPs  $\pm$  SEM compared with those of WT littermates, which are set to 100% and reflect the results obtained from four independent litters (WT:  $100 \pm 12.15$  %, n=7; *Gdnf*<sup>hyper/hyper</sup>:  $163.59 \pm 6.42$  %, n=9; P=0.000). (F) Scatter plots showing the quantification of NPC numbers at E14.5. Data is collected for 207 WT and 431 *Gdnf*<sup>hyper/hyper</sup> UBS, which had total of 8805 and 12696 NPCs, respectively (n=4 kidneys for WT; n=8 kidneys for *Gdnf*<sup>hyper/hyper</sup>). (G) Proportion of proliferating SIX2-positive NPs in E11.5 kidneys cultured for 24 hours with or without (control) 100 ng/mL GDNF supplementation. (Control:  $6.25 \pm 0.34$  %, n=5; GDNF:  $4.64 \pm 0.33$  %, n=5; P=0.012). (H) Scatter plots showing the quantification of NPC numbers at P4. Data is collected for 315 WT and 245 *Gdnf*<sup>hyper/hyper</sup> UBS, which had total of 0 and 462 NPCs, respectively (n=4 kidneys for WT; n= 2 kidneys for *Gdnf*<sup>hyper/hyper</sup>). Scale bar: 100 $\mu$ m.

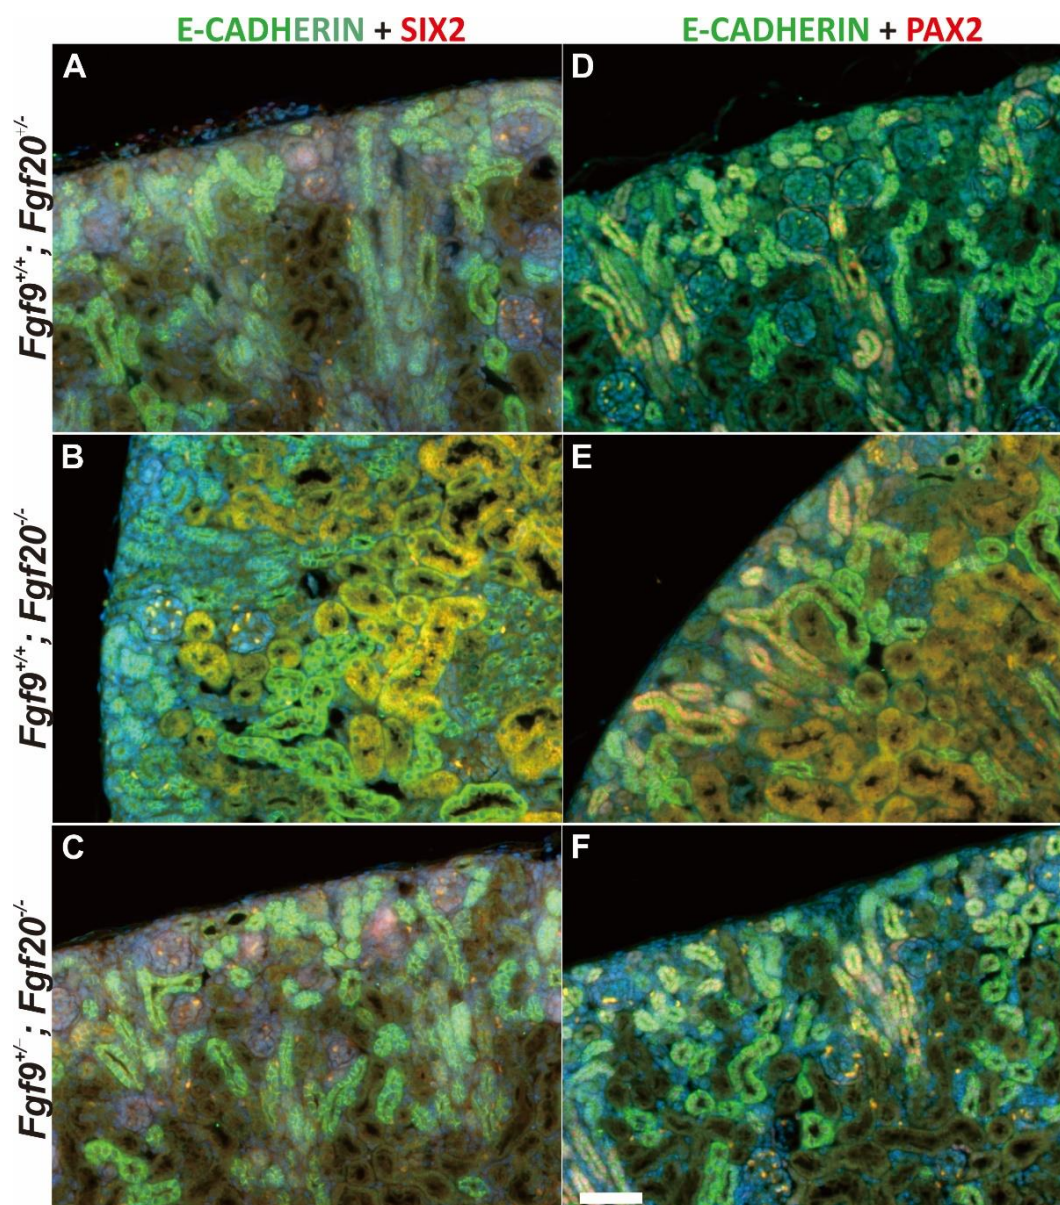

**Figure S2. Nephron progenitors are not maintained in postnatal kidneys upon *Fgf9* and *Fgf20* deletion.** Representative images showing SIX2 (red) and E-CADHERIN (green) staining in (A) *Fgf20*<sup>+/-</sup> (n=3), (B) *Fgf20*<sup>-/-</sup> (n=4) and (C) *Fgf9*<sup>+/-</sup>;*Fgf20*<sup>-/-</sup> (n=4) kidneys at P6. (D) PAX2 (red) and E-CADHERIN (green) staining in *Fgf20*<sup>+/-</sup> (n=3), (E) *Fgf20*<sup>-/-</sup> (n=4) and (F) *Fgf9*<sup>+/-</sup>;*Fgf20*<sup>-/-</sup> (n=4) kidneys at P6 all indicate similar result. Cap mesenchyme that would be positive for SIX2 or PAX2, indicating the presence of nephron progenitors and differentiating precursors, cannot be detected in any of the FGF-deficient kidneys. Scale bar: 50μm.

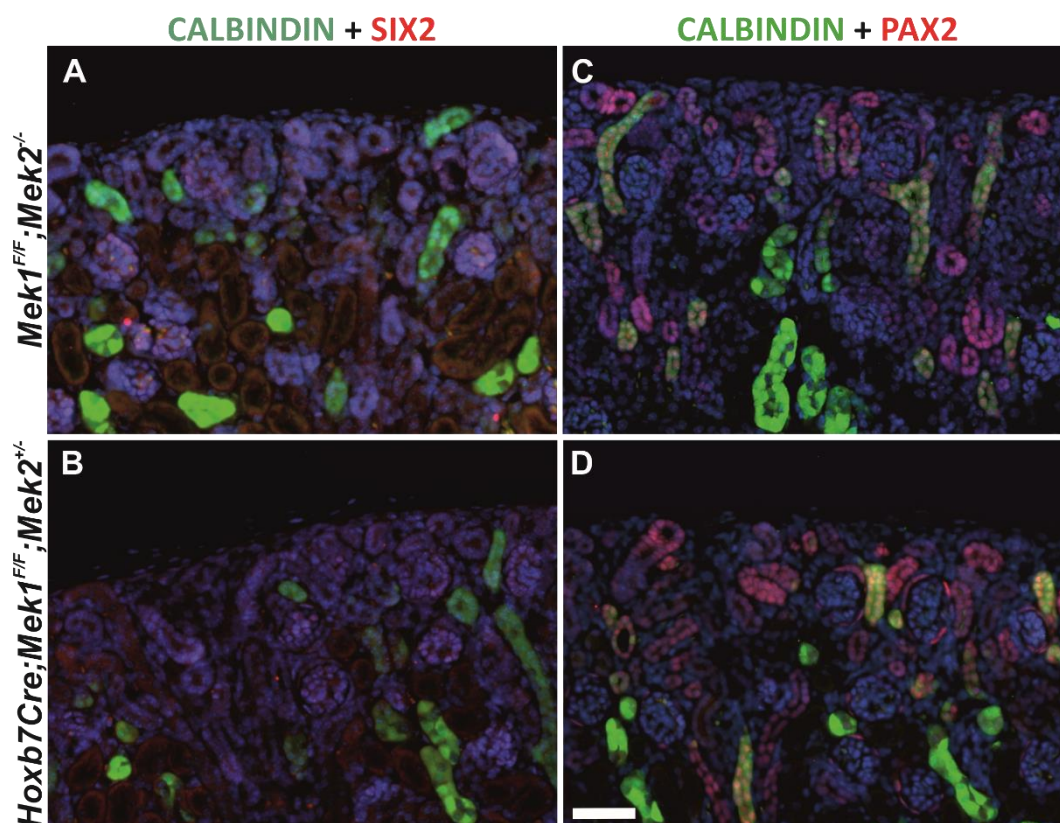

**Figure S3. Nephron progenitors are not maintained in *Mek1/2*-deficient postnatal kidneys.**

Representative images showing SIX2 (red) and E-CADHERIN (green) staining in (A) *Mek2<sup>-/-</sup>* (n=2) and (B) *Hoxb7Cre;Mek1<sup>fl/fl</sup>;Mek2<sup>+/-</sup>* (n=2) kidneys at P5. (C) PAX2 (red) and E-CADHERIN (green) staining in *Mek2<sup>-/-</sup>* (n=2) and (D) *Hoxb7Cre;Mek1<sup>fl/fl</sup>;Mek2<sup>+/-</sup>* (n=2) kidneys at P5. Cap mesenchyme that would be positive for SIX2 or PAX2, indicating the presence of nephron progenitors and differentiating precursors, cannot be detected in any of the MEK-deficient kidneys. *Scale bar: 50μm.*

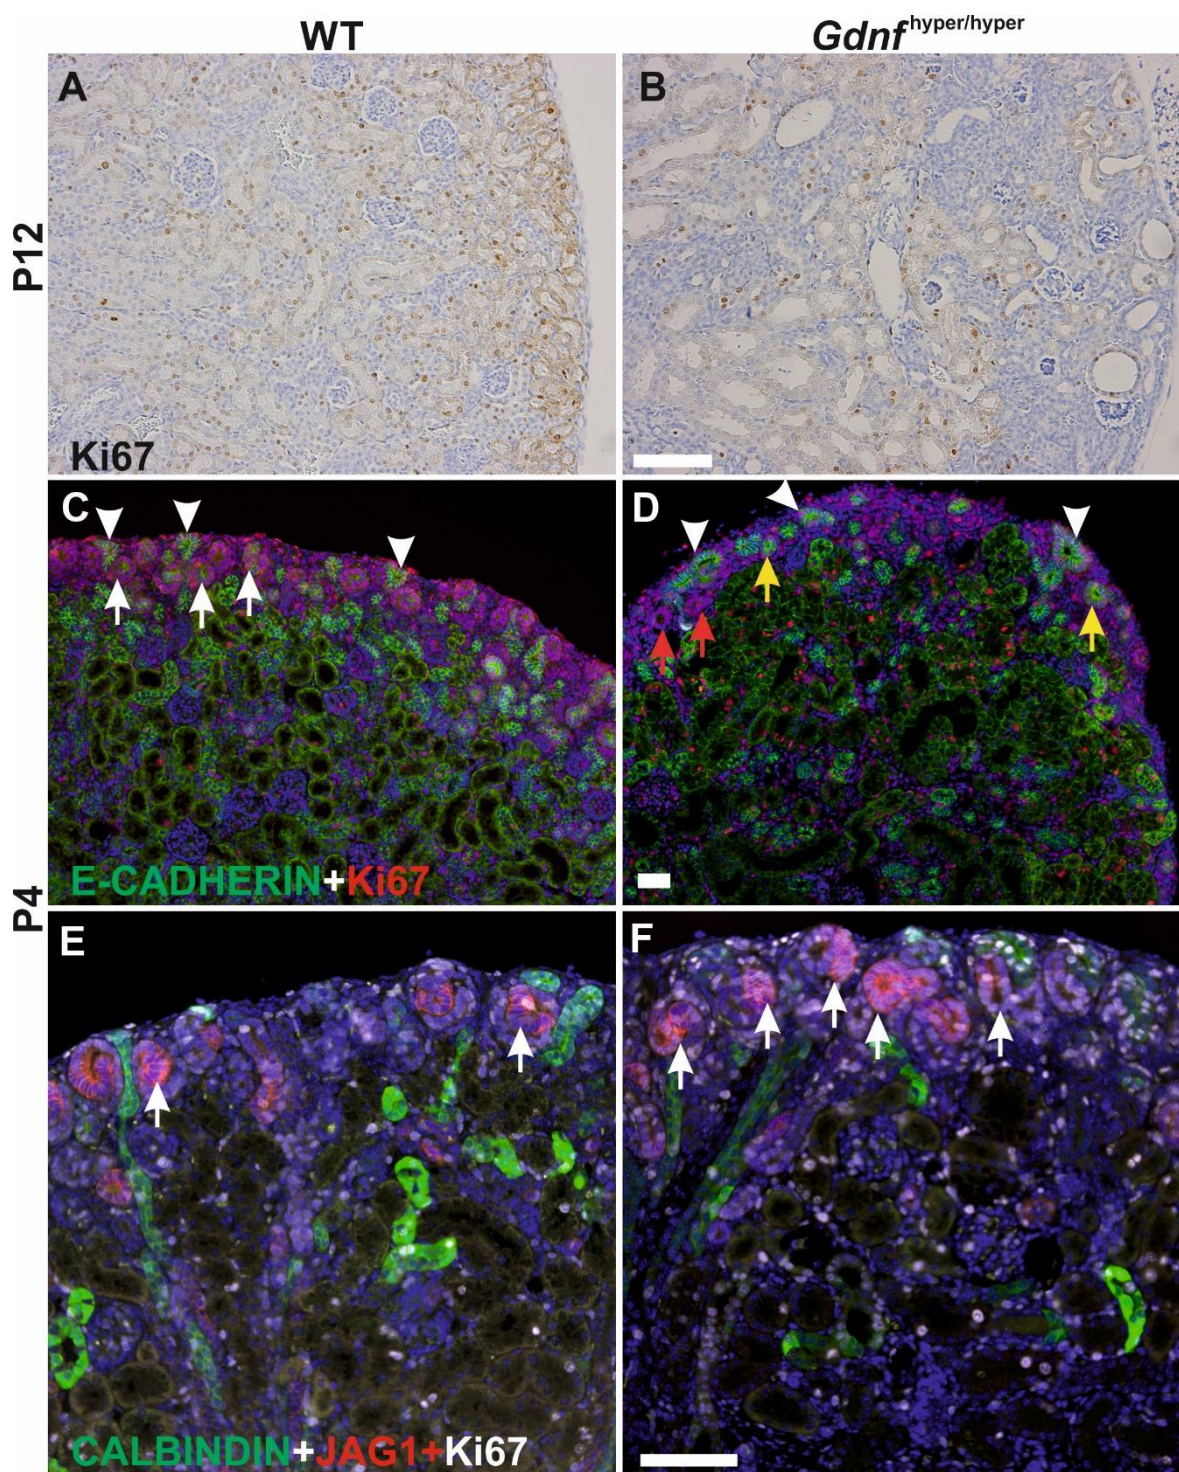

**Figure S4. Sustained cortical proliferation in postnatal nephrogenesis in *Gdnf*<sup>hyper/hyper</sup> kidneys.** (A) Ki67 staining visualizes similar pattern of proliferative cells in P12 WT and (B) *Gdnf*<sup>hyper/hyper</sup> kidneys (n=2 kidneys/genotype). (C) Co-staining of E-CADHERIN (green) and Ki67 (red) in P4 WT and (D) *Gdnf*<sup>hyper/hyper</sup> kidneys (n=3 kidneys/genotype). White arrows point to nephron precursors, which are double positive for Ki67 and E-CADHERIN, red arrows indicate newly induced renal vesicles, which have not yet have acquired the expression of E-CADHERIN.

Yellow arrows point to distal tubules of nephrons positive for Ki67 and abnormally positioned to renal cortex. Arrowheads indicate ureteric buds, which also show proliferative activity. (E) P4 WT kidneys (n=4) stained with JAG1 (red), CALBINDIN (green) and Ki67 (white) shows proliferation in differentiating nephron precursors (arrows). (F) Corresponding triple staining in *Gdnf*<sup>hyper/hyper</sup> kidneys (n=4) demonstrates slightly more on-going nephrogenesis (arrows) but similar proliferation pattern. *Scale bar*: 100µm.

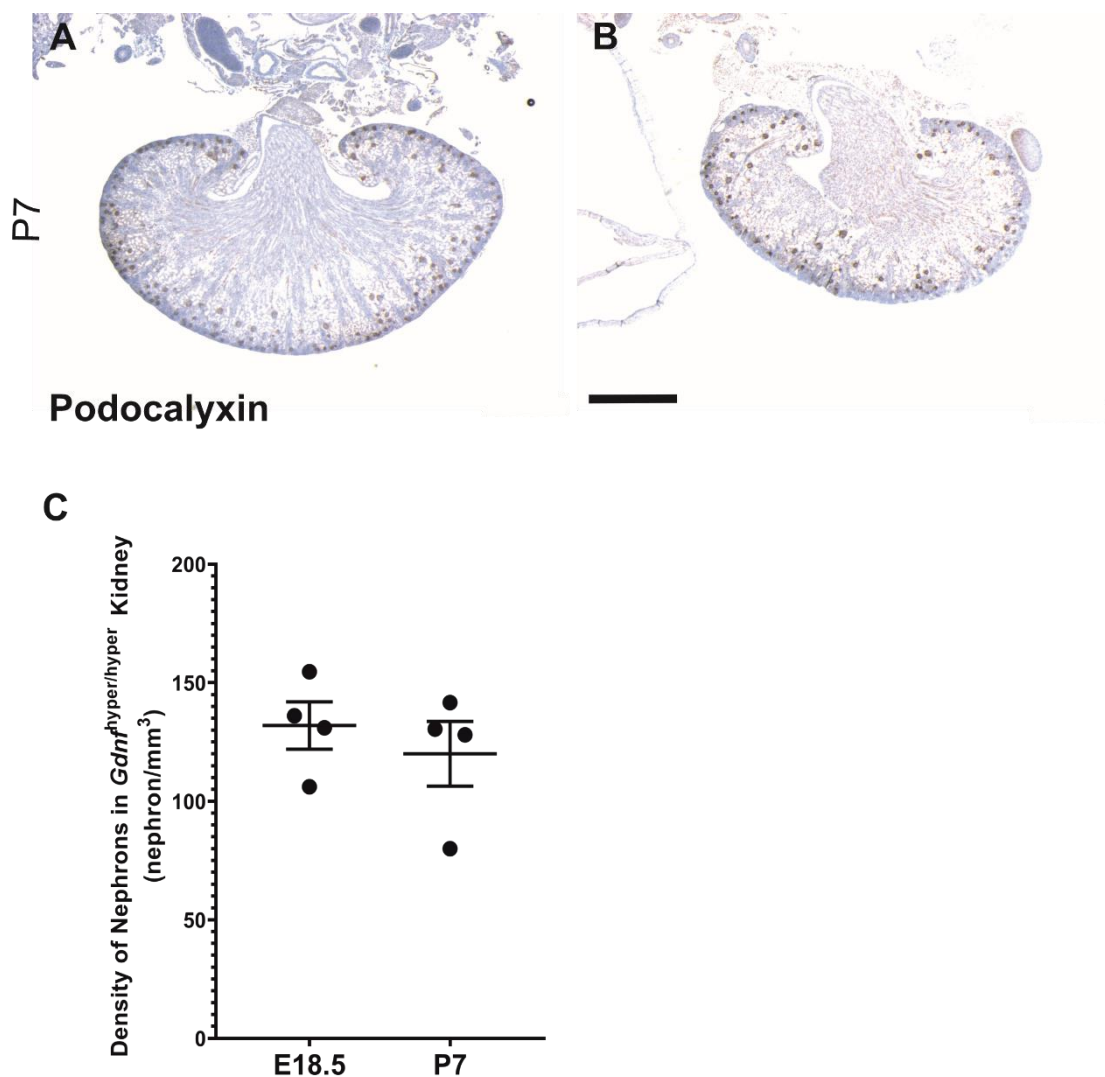

**Figure S5. Glomerular density assessment.** Representative images showing the distribution of glomeruli in P7 WT kidney (A) and  $Gdnf^{hyper/hyper}$  kidneys (B) (n=6 kidneys for WT; n=4 kidneys for  $Gdnf^{hyper/hyper}$ ). Chromogenic antibody staining was performed for PODOCALYXIN and counterstained with hematoxylin. (C) Scatter plots of nephron density in  $Gdnf^{hyper/hyper}$  kidneys at E18.5 and P7. Data are presented as the mean quantity of nephron per cubic millimeter  $\pm$  SEM. (n=4 kidneys/genotype). *Scale bar:* 1mm.

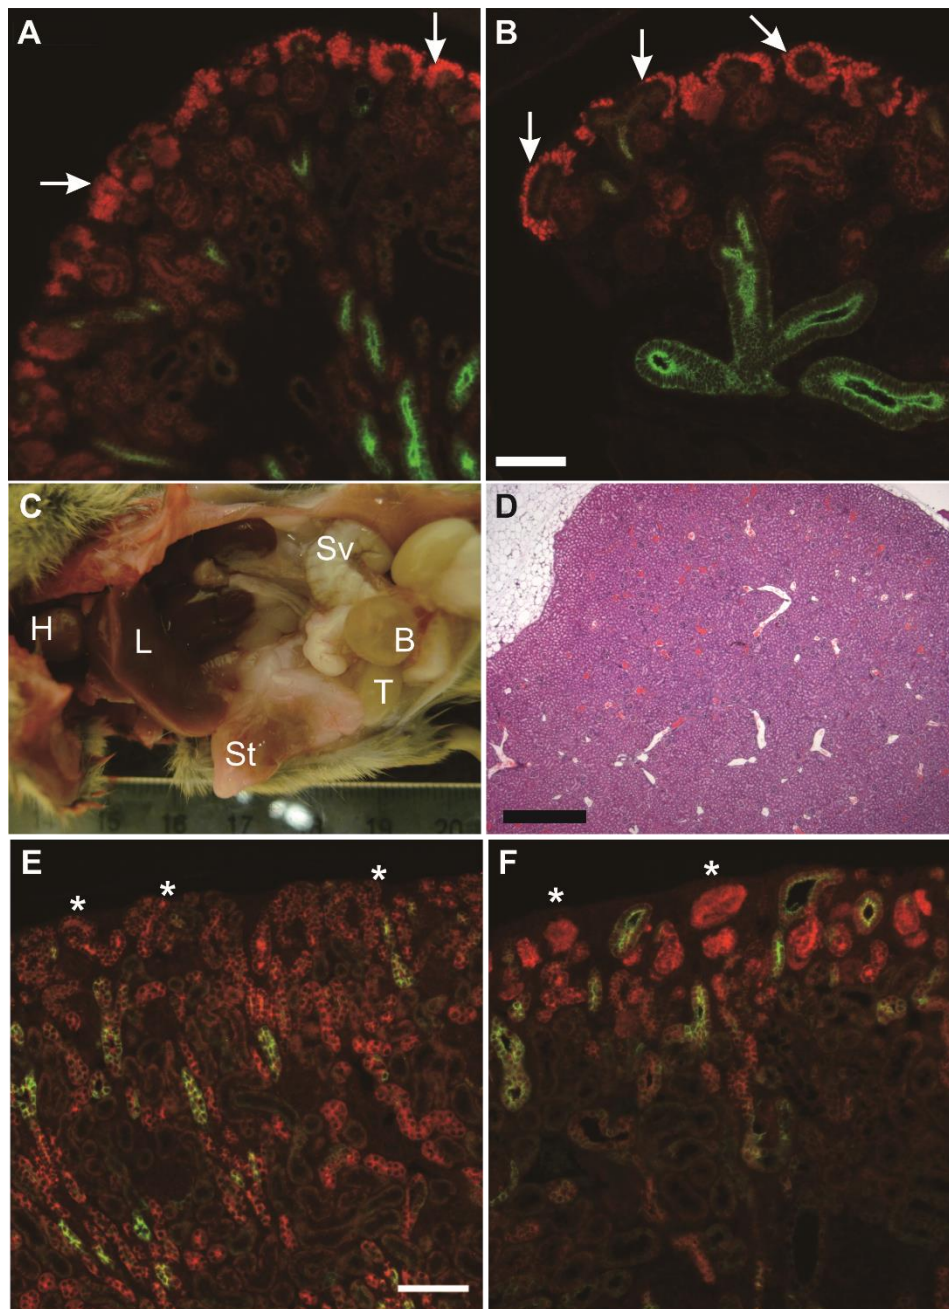

**Figure S6. *Gdnf*<sup>wt/hyper</sup> animals show mildly diminished embryonic nephron progenitor count without consequences on postnatal nephrogenesis.** (A) Wild type and (B) *Gdnf*<sup>wt/hyper</sup> kidneys at E16.5 stained with SIX2 (red), to detect nephron progenitors, and keratin 8 (green) to visualize collecting duct. Arrows point to nephron progenitors, which appear as a thinner layer in *Gdnf*<sup>wt/hyper</sup> kidneys indicating their diminished amount. (C) Abdominal cavity of an adult *Gdnf*<sup>wt/hyper</sup> mouse at the age of 7 months shows no signs of tumors or other abnormalities. B: bladder, H: heart, L: liver, St: stomach, Sv: seminal vesicle. (D) Histology of



*Gdnf*<sup>wt/hyper</sup> kidney at the age of 4 months shows no neoplasia or tumorigenic growth. (E) Wild type and (F) *Gdnf*<sup>wt/hyper</sup> kidneys at P5 stained with SIX2 (red), to detect nephron progenitors, and keratin 8 (green) to visualize collecting duct. Asterisks indicate loss of SIX2-positive nephron progenitors in both genotypes.

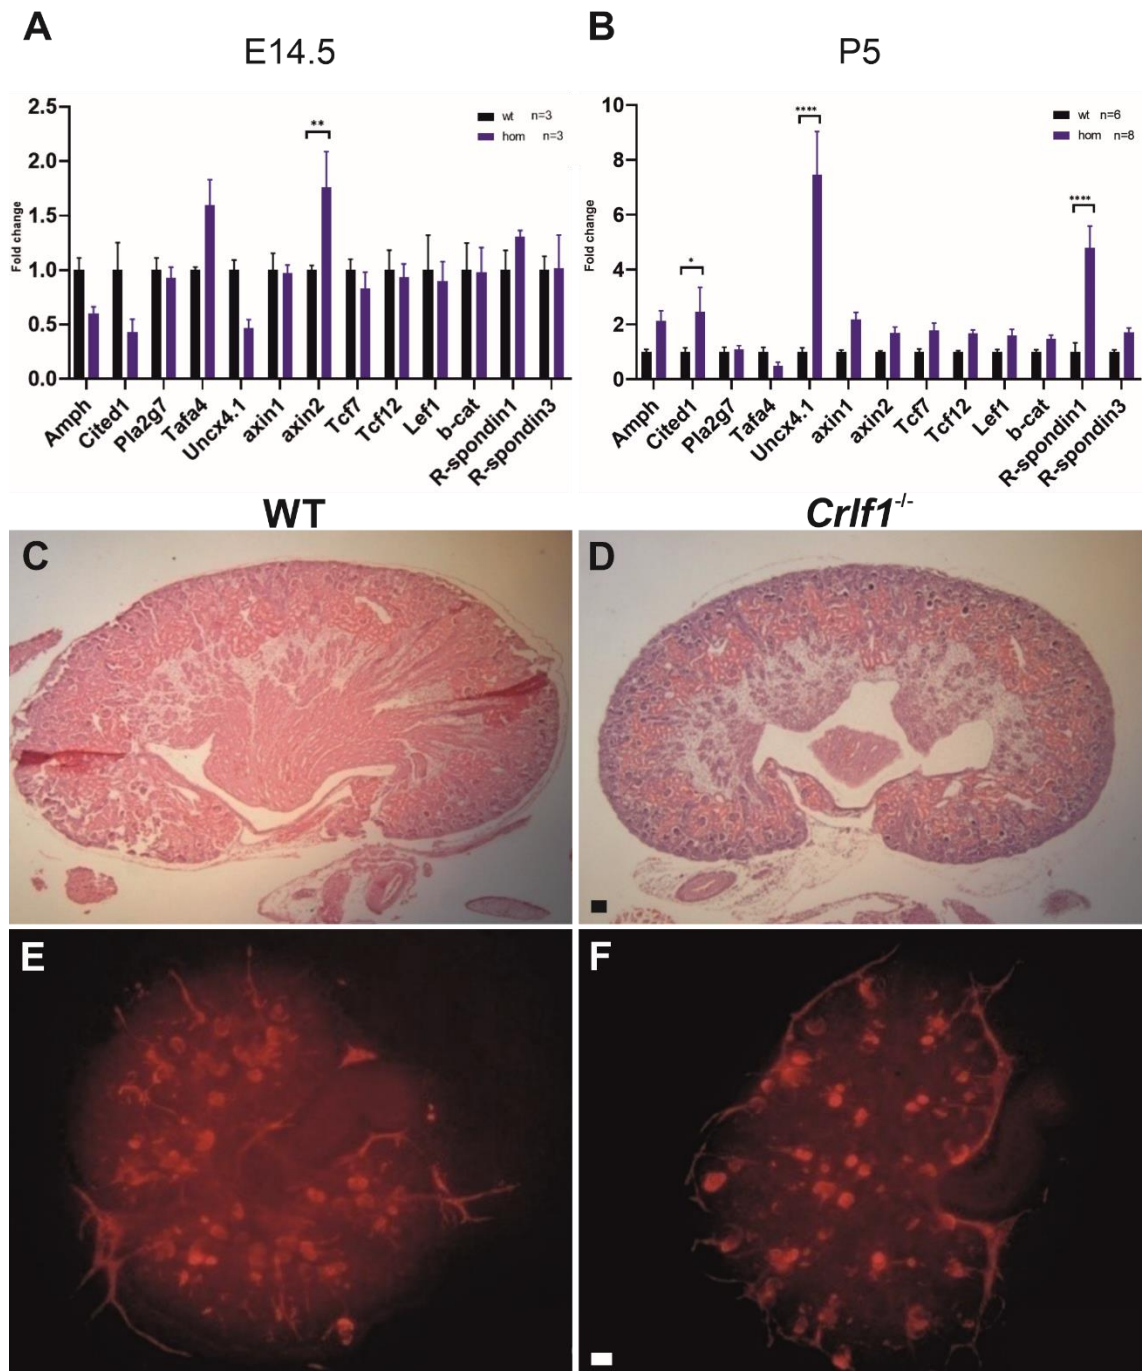

**Figure S7. Gene regulatory networks mediating GDNF functions to nephron progenitors.**

(A) qRT-PCR based quantification of the relative expression levels of canonical WNT signaling targets at E14 (n=3 kidneys/genotype) and (B) at P5 (n=6 for WT; n=8 for *Gdnf*<sup>hyper/hyper</sup>). Embryonic *Gdnf*<sup>hyper/hyper</sup> kidneys (E14.5) show significant upregulation of canonical WNT signaling target *Axin2*, while the nephron progenitor specific targets *Amph*, *Cited1* and *Unx4.1* are slightly downregulated. Postnatal *Gdnf*<sup>hyper/hyper</sup> kidneys (P5) have increased expression of selected nephron progenitor specific WNT targets (*Cited1* & *Unc4.1*) and significantly more expression of *R-spondin1*. (C) Analysis of kidney morphology with hematoxylin and eosin staining at P0 WT and (D) *Crlf1*<sup>-/-</sup> kidneys (n=15) revealed normal kidney size and organization. (E) PODOCALYXIN immunofluorescence visualizes developing glomeruli in E11.5 WT and (F) *Crlf1*<sup>-/-</sup> kidneys (n=6/genotype) cultured for 4 days. The average number of nephrons was 34±10 in *Clf1*<sup>-/-</sup> vs. 29±8 in WT kidneys (p=0.34). Scale bar: 100 µm.

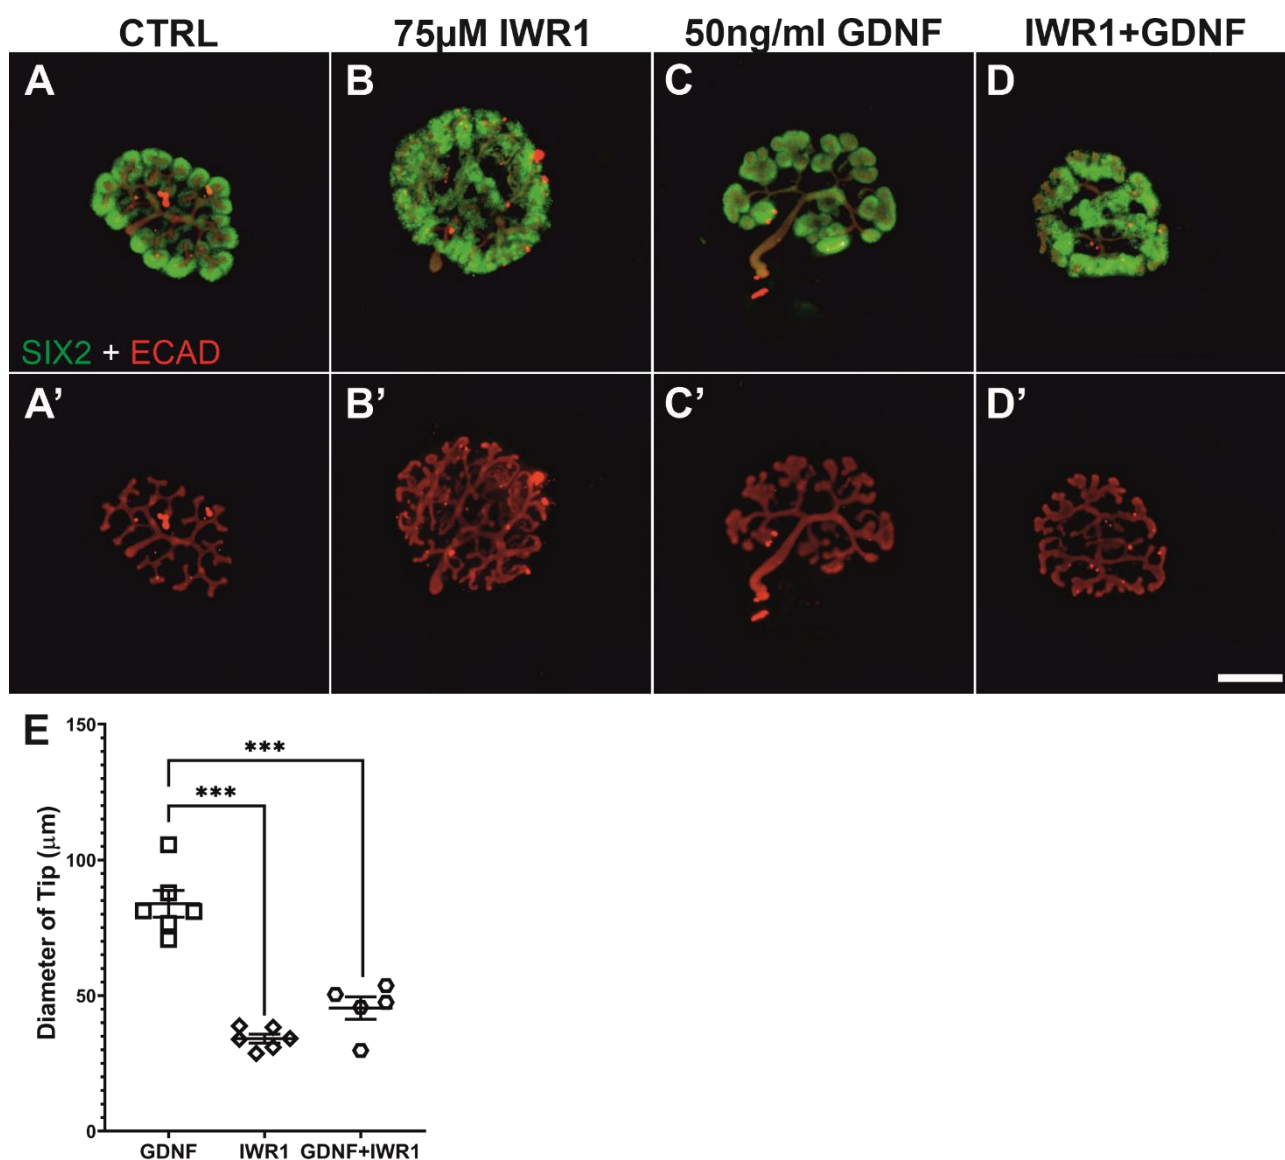

**Figure S8. WNT inhibition alleviates GDNF's effect on ureteric bud tip morphology.** E12.5 kidneys cultured for 48h in (A) DMSO (Ctrl), (B) 75µM tankyrase inhibitor (IWR1), which prevents canonical WNT signaling, (C) 50ng/ml GDNF and (D) 75µM IWR1+ 50ng/ml GDNF. SIX2 (green) visualizes nephron progenitors and E-cadherin (ECAD, red) labels ureteric bud epithelium. Control kidney (DMSO) shows typical ureteric bud branching morphogenesis and intimate localization of nephron progenitors around each bud tips. WNT inhibition (IWR1) has minor effect on ureteric bud tip morphology but instead disperses nephron progenitors to spatially wider and looser patterns. GDNF treatment mimics genetic increase seen in *Gdnf*<sup>hyper/hyper</sup>

kidneys where ureteric bud tips are severely expanded. Simultaneous exogenous GDNF and WNT inhibition rescues ureteric bud tip morphology while nephron progenitors are still incorrectly localized but appear more adherent to each other than in IWR1 only treated kidneys. (E) Quantification of tip diameter in IWR1, GDNF and IWR1+GDNF treated kidneys exemplified in A-D (n= 6 / treatment; tips measured: GDNF: 101, IWR1: 131, 75 $\mu$ M IWR1+ 50ng/ml GDNF: 115) shows significant normalization of ureteric bud tip morphology upon IWR1 treatment in kidneys cultured with excess GDNF. *Scale bar: 400 $\mu$ m.*

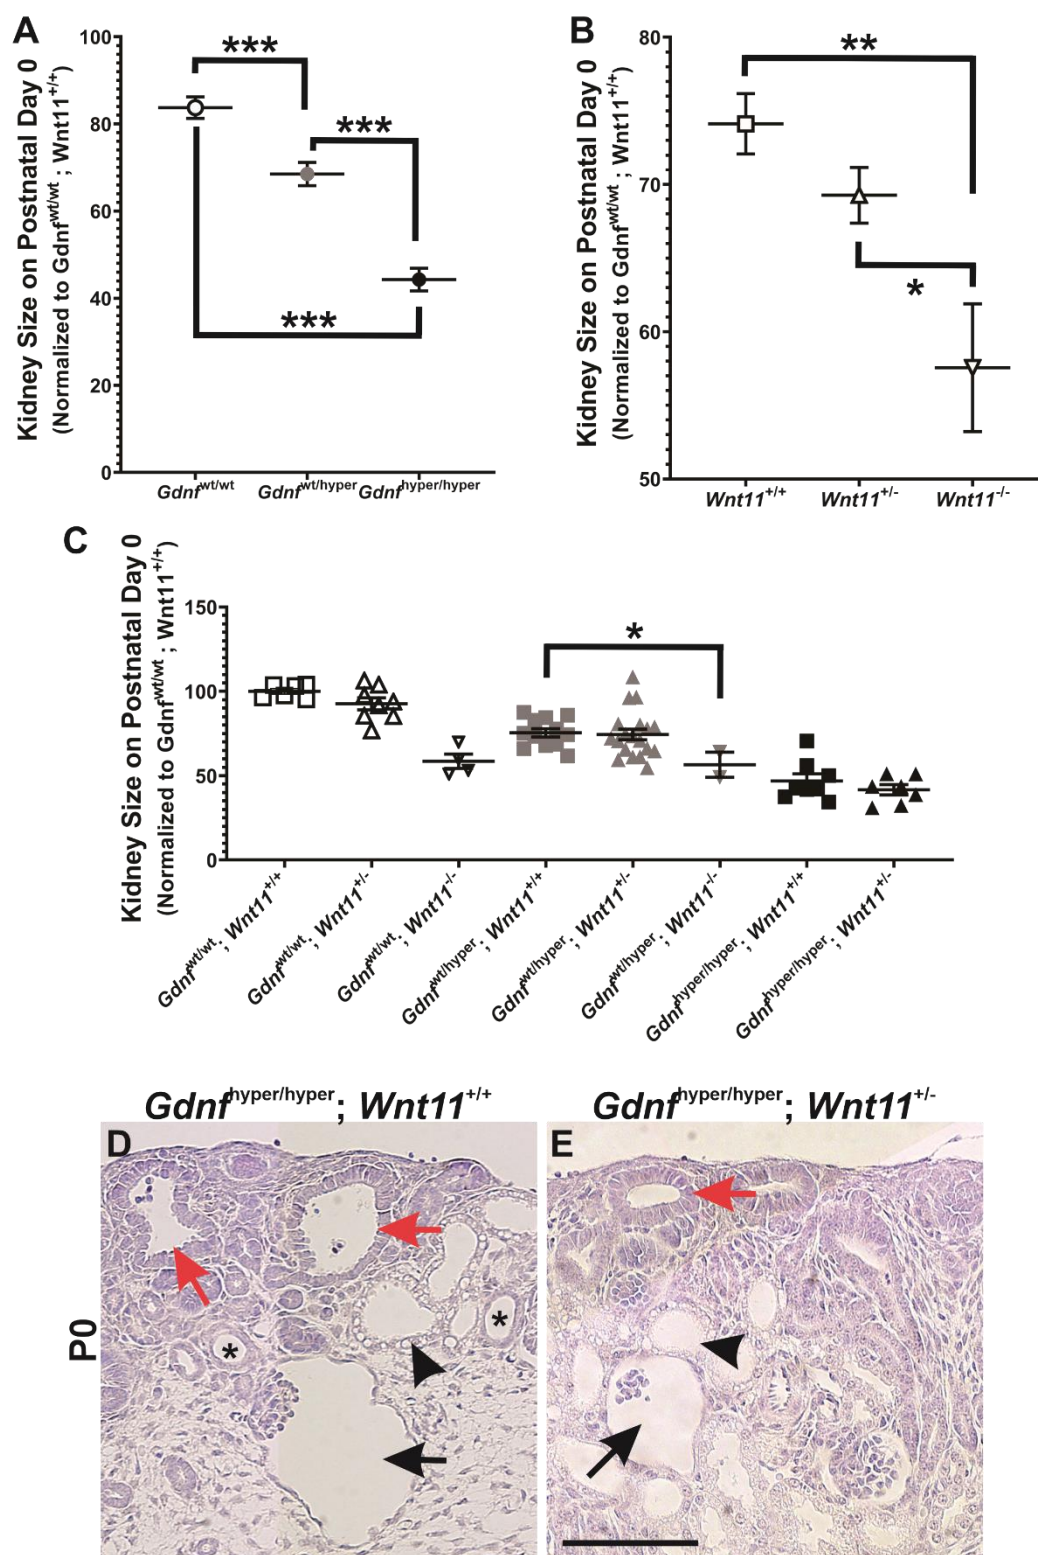

**Figure S9.** The effect of *Wnt11* deletion in GDNF-hyperomorphic kidneys. (A) Main effect analysis of genetically increased GDNF on kidney size in  $Gdnf^{hyper}; Wnt11$  compound background. Data are presented as estimated marginal means of area obtained via measuring the

coronal plane of each kidney  $\pm$  SD compared to those of  $Gdnf^{wt/wt};Wnt11^{+/+}$  controls and reflect the results obtained from five independent litters. The (mean) size of  $Gdnf^{wt/wt};Wnt11^{+/+}$  kidney(s) in each litter was set to 100% in order to normalize the difference among litters. (B) Main effect analysis of genetically decreased *WNT11* on kidney size in  $Gdnf^{hyper};Wnt11$  compound background. Similar analysis was performed as in A. (C) Presentation of size analysis as whole. Data are presented as means of area obtained by measuring the coronal plane of each kidney  $\pm$ SEM in comparison to  $Gdnf^{wt/wt};Wnt11^{+/+}$  controls, which are set to 100% and reflect the results obtained from five independent litters. ( $Gdnf^{wt/wt};Wnt11^{+/+}$ : 100  $\pm$  4.09%, n=6 kidneys;  $Gdnf^{wt/wt};Wnt11^{+/-}$ : 92.61  $\pm$  3.53%, n=8 kidneys;  $I dph^{wt/wt};Wp\beta 1^{-/-}$ : 58.58  $\pm$  4.25%, n=4 kidneys;  $I dph^{wt/hyper};Wnt11^{+/+}$ : 75.45  $\pm$  2.44%, n=12 kidneys;  $Gdnf^{wt/hyper};Wnt11^{+/-}$ : 73.52  $\pm$  2.74%, n=19 kidneys;  $Gdnf^{wt/hyper};Wnt11^{-/-}$ : 56.52  $\pm$  7.47%, n=2 kidneys;  $Gdnf^{hyper/hyper};Wnt11^{+/+}$ : 46.90  $\pm$  4.16%, n=8 kidneys;  $Gdnf^{hyper/hyper};Wnt11^{+/-}$ : 41.67  $\pm$  3.06%, n=7 kidneys). The estimated marginal means of kidney size in (A) and (B) are results of the analysis containing all the data about kidney size in (C). Kidney size in  $Gdnf^{wt/hyper};Wnt11^{-/-}$  is significantly smaller than that in  $Gdnf^{wt/hyper};Wnt11^{wt/wt}$  mutants (P=0.014, unpaired 2-tailed t-test). (D) Representative H&E staining image showing morphology in cortical region of  $Gdnf^{hyper/hyper};Wnt11^{+/+}$  and (E)  $Gdnf^{hyper/hyper};Wnt11^{+/-}$  kidney at P0 (n=3 kidneys/genotype). The dilated UB (red arrow), collecting duct cysts (black arrow head), and cysts in Bowman's space (black arrow) are slightly improved in  $Gdnf^{hyper/hyper};Wnt11^{+/-}$  kidneys than those seen in  $Gdnf^{hyper/hyper}$ . \* denotes P < 0.05, \*\* denotes P < 0.01, \*\*\* denotes P < 0.001 in comparison with each other; one-way ANOVA followed by Bonferroni's *post-hoc* test. Scale bar: 100 $\mu$ m.

**Table S1.** The primary and secondary antibodies used in this study.

| <b>Primary Antibody</b> | <b>Host</b> | <b>Dilution</b> | <b>Catalogue code &amp; Manufacturer</b> |
|-------------------------|-------------|-----------------|------------------------------------------|
| CALBINDIN               | goat pAb    | 1:500           | sc-7691 - Santa Cruz Biotechnology       |
| CYCLIN D1               | rabbit mAb  | 1:400           | RM-9104 - NeoMarkers (Thermo Scientific) |
| EPITHELIAL CADHERIN     | goat pAb    | 1:500           | AF748 - R&D Systems                      |
| JAG1                    | rat mAb     | 1:200           | TS1.15H - Hybridoma Bank                 |
| Ki67                    | rabbit mAb  | 1:200           | 15580 - Abcam                            |
| LEF1                    | rabbit mAb  | 1:400           | 2230 - Cell Signaling Technology         |
| PAX2                    | rabbit pAb  | 1:400           | 71-6000 -Invitrogen                      |
| PODOCALYXIN             | goat pAb    | 1:300           | AF1556 - R&D Systems                     |
| SIX2                    | rabbit pAb  | 1:500           | 11562-1-A - ProteinTech                  |
| SOX9                    | rabbit pAb  | 1:500           | AB5535 - Millipore                       |

| <b>Secondary Antibody</b>                                      | <b>Host</b> | <b>Dilution</b> | <b>Catalogue code &amp; Manufacturer</b>           |
|----------------------------------------------------------------|-------------|-----------------|----------------------------------------------------|
| anti-goat Alexa Fluor® 488                                     | Donkey      | 1:400           | 705-546-147 - Jackson Immuno Research Laboratories |
| anti-rat Cy <sup>TM</sup> 3                                    | Donkey      | 1:400           | 712-165-153 - Jackson Immuno Research Laboratories |
| anti-rabbit Alexa Fluor® 568                                   | Donkey      | 1:400           | A10042 – ThermoFisher                              |
| anti-goat Alexa Fluor® 647                                     | Donkey      | 1:400           | A-21447 - ThermoFisher                             |
| anti-rabbit IgG (H+L) - Horseradish Peroxidase (HRP) conjugate | Goat        | 1:2000          | 1721034 - Bio-Rad                                  |
| anti-goat IgG (H+L) - Horseradish Peroxidase (HRP) conjugate   | Rabbit      | 1:500           | 1721034 - Bio-Rad                                  |

**Table S2.** The primers used for qRT-PCR in this study.

| <b>GENE</b>    | <b>Forward primer</b>  | <b>Reverse primer</b> |
|----------------|------------------------|-----------------------|
| <i>Crlf1</i>   | GGAATCTGGAGCGAGTGGAG   | TATGCGTGCTTCTTGAGCCA  |
| <i>Etv4</i>    | CTTCCATAGCCCCACCACC    | GGGGGACTTGATGGCGATTT  |
| <i>Etv5</i>    | CAGCCCGCCACGGAG        | GCCCTCGACAGTCCTCTGAT  |
| <i>Lama1</i>   | TTAGCCATCGGGACCTCAGA   | GCAAATGCACATGCCTCCAA  |
| <i>Sostdc1</i> | GGCAGGCATTTTCAGTAGCAC  | CACTGGCCGTCCGAAATGTA  |
| <i>Srgn</i>    | CGTCCTGGTTTGGGGATCTT   | TGTGGTCCCTTCTCCTCGAT  |
| <i>Wfdc2</i>   | GACAGCCAGTGTTCTGGCAA   | CGACTCCAGATGCACAGTCC  |
| <i>Wnt11</i>   | ATATCCGGCCTGTGAAGGAC   | CACTGCCGTTGGAAGTCTTG  |
|                |                        |                       |
| <i>Ctla2a</i>  | ACCGTGGACAACAAAATGATGG | TCCAAACTTGGATCAGGGGG  |
| <i>Fgf9</i>    | AAAGGGGATTCTCAGGCGG    | CGTTCATGCCGAGGTAGAGT  |
| <i>Fgf20</i>   | TAAAGGGGATTCTCAGGCGG   | TCATGCCGAGGTAGAGTCCA  |
| <i>Wnt4</i>    | TGTTCCACACTGGACTCCCT   | GTATACAAAGGCCGCCTCCC  |



|              |                          |                         |
|--------------|--------------------------|-------------------------|
| <i>Wnt9b</i> | TGTCAGTTCCAGTTCAGGCA     | GGGGAGTCGTCACAAGTACAG   |
|              |                          |                         |
| <i>Gdnf</i>  | CGCTGACCAGTGACTCCAATATGC | TGCCGCTTGTTTATCTGGTGACC |
|              |                          |                         |
| <i>Gapdh</i> | GCCTCGTCCCGTAGACAAAA     | ATGAAGGGGTCGTTGATGGC    |
| <i>Hprt1</i> | CAGTCCCAGCGTCGTGATTA     | TGGCCTCCCATCTCCTTCAT    |
| <i>Pgk1</i>  | TTGGACAAGCTGGACGTGAA     | AACGGACTTGGCTCCATTGT    |
